# Supplementary material
Source: MDPI journal article supplement (https://www.mdpi.com/2297-8739/8/6/84)
Supplement: s1 [file s1]

**Supplementary Materials**  
**Automated Screening and Filtering Scripts for GC×GC-TOFMS**  
**Metabolomics Data**

Seo Lin Nam <sup>1</sup>, A. Paulina de la Mata <sup>1</sup> and James J. Harynuk <sup>1, 2</sup>

<sup>1</sup>Department of Chemistry, University of Alberta: delamata@ualberta.ca

<sup>2</sup>Author to whom correspondence should be addressed; E-Mail: james.harynuk@ualberta.ca;

Tel.: +1-780-492-8303 (ext. 123); Fax: +1-780-492-8231. Department of Chemistry University of Alberta, Edmonton, Alberta, T6G 2G2, Canada

Note: Copies of scripts developed for this research, and other related scripts for metabolomics work have been posted on GitHub at:

[https://github.com/seolinnam/Scripts\\_Metabolomics](https://github.com/seolinnam/Scripts_Metabolomics)  
<https://github.com/orgs/Harynuk-posse/people>

## Preparation of Standard Mixtures for Evaluation of the Scripts

**Table S1.** Compounds included in the standard mixtures

| Amino acid      | Carbohydrate              |
|-----------------|---------------------------|
| L-Alanine       | D-(–)-Arabinose           |
| L-Arginine      | D-(–)-Fructose            |
| L-Aspartic acid | D-(+)-Galactose           |
| L-Cystine       | D-(+)-Glucose             |
| L-Glutamic acid | α-Lactose monohydrate     |
| Glycine         | D-(+)-Maltose monohydrate |
| L-Histidine     | D-(+)-Mannose             |
| L-Isoleucine    | D-(–)-Ribose              |
| L-Leucine       | Sucrose                   |
| L-Lysine        | D-(+)-Xylose              |
| L-Methionine    |                           |
| L-Phenylalanine |                           |
| L-Proline       |                           |
| L-Serine        |                           |
| L-Threonine     |                           |
| L-Tyrosine      |                           |
| L-Valine        |                           |

| Fatty acid                  | Fatty acid methyl ester                      |
|-----------------------------|----------------------------------------------|
| C4:0 Butyric acid           | C4:0 Methyl butyrate                         |
| C6:0 Hexanoic acid          | C6:0 Methyl hexanoate                        |
| C8:0 Octanoic acid          | C8:0 Methyl octanoate                        |
| C10:0 Decanoic acid         | C10:0 Methyl decanoate                       |
| C12:0 Lauric acid           | C11:0 Methyl undecanoate                     |
| C13:0 Tridecanoic acid      | C12:0 Methyl laurate                         |
| C14:0 Myristic acid         | C13:0 Methyl tridecanoate                    |
| C14:1 Myristoleic acid      | C14:0 Methyl myristate                       |
| C14:1T Myristelaidic acid   | C14:1 Methyl myristoleate                    |
| C15:0 Pentadecanoic acid    | C15:0 Methyl pentadecanoate                  |
| C15:1 10-Pentadecenoic acid | C15:1 Methyl cis-10-pentadecenoate           |
| C16:0 Palmitic acid         | C16:0 Methyl palmitate                       |
| C16:1 Palmitoleic acid      | C16:1 Methyl palmitoleate                    |
| C16:1T Palmitelaidic acid   | C17:0 Methyl heptadecanoate                  |
| C17:0 Heptadecanoic acid    | C17:1 cis-10-Heptadecanoic acid methyl ester |
| C17:1 10-Heptadecenoic acid | C18:0 Methyl stearate                        |
| C18:0 Stearic acid          | C18:1T trans-9-Elaidic acid methyl ester     |
| C18:1T Elaidic acid         | C18:1 cis-9-Oleic acid methyl ester          |
| C18:1 Oleic acid            | C18:2T Methyl linolelaidate                  |
| C18:1T Petroelaidic acid    | C18:2 Methyl linoleate                       |
| C18:1T Transvaccenic acid   | C20:0 Methyl arachidate                      |
| C18:1 Vaccenic acid         | C18:3 Methyl γ-linolenate                    |

| Fatty acid |                              | Fatty acid methyl ester |                                                       |
|------------|------------------------------|-------------------------|-------------------------------------------------------|
| C18:2TT    | Linoelaidic acid             | C20:1                   | Methyl cis-11-eicosenoate                             |
| C18:2      | Linoleic acid                | C18:3                   | Methyl linolenate                                     |
| C18:3      | Gamma linolenic acid         | C21:0                   | Methyl heneicosanoate                                 |
| C18:3      | Linolenic acid               | C20:2                   | cis-11,14-Eicosadienoic acid methyl ester             |
| C20:0      | Arachidic acid               | C22:0                   | Methyl behenate                                       |
| C20:1      | 11-Eicosenoic acid           | C20:3                   | cis-8,11,14-Eicosatrienoic acid methyl ester          |
| C21:0      | Heneicosanoic acid           | C22:1                   | Methyl erucate                                        |
| C20:2      | 11-14 Eicosadienoic acid     | C20:3                   | cis-11,14,17-Eicosatrienoic acid methyl ester         |
| C20:3      | Homogamma Linolenic acid     | C20:4                   | cis-5,8,11,14-Eicosatetraenoic acid methyl ester      |
| C20:4      | Arachidonic acid             | C23:0                   | Methyl tricosanoate                                   |
| C20:3      | 11,14,17 Eicosatrienoic acid | C22:2                   | cis-13,16-Docosadienoic acid methyl ester             |
| C22:0      | Behenic acid                 | C24:0                   | Methyl lignocerate                                    |
| C22:1      | Erucic acid                  | C20:5                   | cis-5,8,11,14,17-Eicosapentaenoic acid methyl ester   |
| C20:5      | Eicosapentaenoic acid        | C24:1                   | Methyl nervonate                                      |
| C22:2      | Docosadienoic acid           | C22:6                   | cis-4,7,10,13,16,19-Docosahexaenoic acid methyl ester |
| C23:0      | Tricosanoic acid             |                         |                                                       |
| C22:4      | Docosatetraenoic acid        |                         |                                                       |
| C22:5n-6   | Docosapentaenoic acid        |                         |                                                       |
| C22:5n-3   | Docosapentaenoic acid        |                         |                                                       |
| C24:0      | Lignoceric acid              |                         |                                                       |
| C24:1      | Nervonic acid                |                         |                                                       |
| C22:6      | Docosahexaenoic acid         |                         |                                                       |

For the standard mixture of each class of compounds, high and low concentration solutions were prepared with a serial dilution from the stock solution.

#### A) Amino acid standard

Stock solution: 2.5  $\mu\text{mol/mL}$  for each component (AAS18-10 mL analytical standard, Millipore-Sigma Canada)

- 100-fold dilution (25 nmol/mL) was made in methanol to make a high-concentration standard solution.
- 1000-fold dilution (2.5 nmoles/mL) was made in methanol to make a low-concentration standard solution.

#### B) Fatty acid standard

Stock solution: 35.1 mg of total fatty acids (GLC-744, Nu-Check, MN, USA) were dissolved in 2.2 mL of methanol and isopropanol solution (2 mL MeOH and 0.2 mL IPA). This corresponds to 319  $\mu\text{g/mL}$  for each component.

- 100-fold dilution (3 µg/g) was made in methanol to make a high-concentration standard solution.
- 1000-fold dilution (0.3 µg/g) was made in methanol to make a low-concentration standard solution.

#### C) Fatty acid methyl ester standard

Stock solution: 400 µg/g for each component (SUPELCO 37 Component FAME Mix, Millipore-Sigma Canada)

- 100-fold dilution (4 µg/g) was made in dichloromethane to make a high-concentration standard solution.
- 1000-fold dilution (0.4 µg/g) was made in dichloromethane to make a low-concentration standard solution.

#### D) Carbohydrates standard

Stock solution: 100 µg/mL for each component (Carbohydrates kit, Millipore-Sigma Canada) was made in methanol.

- 100-fold dilution (1 µg/mL) was made in methanol to make a high-concentration standard solution.
- 1000-fold dilution (0.1 µg/mL) was made in methanol to make a low-concentration standard solution.

The indicated volumes (µL) in Table S1 were withdrawn from high or low concentrations of the corresponding standard solution into a GC vial for derivatization.

**Table S2.** Details of standard mixture preparation  $\mu\text{L}$  standard placed in GC vial.

| Vial # | Conc      | AA  | FA  | FAME | Carbohydrate |
|--------|-----------|-----|-----|------|--------------|
| 1      | Low Con   | 10  | 10  | 10   | 10           |
| 2      | Low Con   | 20  | 20  | 20   | 20           |
| 3      | Low Con   | 40  | 40  | 40   | 40           |
| 4      | Low Con   | 60  | 60  | 60   | 60           |
| 5      | Low Con   | 80  | 80  | 80   | 80           |
| 6      | Low Con   | 100 | 100 | 100  | 100          |
| 7      | High Conc | 20  | 20  | 20   | 20           |
| 8      | High Conc | 40  | 40  | 40   | 40           |
| 9      | High Conc | 60  | 60  | 60   | 60           |
| 10     | High Conc | 80  | 80  | 80   | 80           |
| 11     | High Conc | 100 | 100 | 100  | 100          |
| 12     | Mix       | L20 | L20 | H20  | H20          |
| 13     | Mix       | H20 | H20 | L20  | L20          |
| 14     | Mix       | L40 | H40 | L40  | H40          |
| 15     | Mix       | H40 | L40 | H40  | L40          |
| 16     | Mix       | L40 | H40 | H40  | L40          |
| 17     | Mix       | L20 | L20 | L20  | H40          |
| 18     | Mix       | L20 | L20 | L20  | H100         |

**Table S3.** Number of compounds in the standard mixtures that were classified for each group.

| Classes                  | Subgroups  | mix 1  | mix 2  | mix 3  | mix 4  | mix 5  | mix 6  |
|--------------------------|------------|--------|--------|--------|--------|--------|--------|
| Carbohydrates            | 4TMS       | 0      | 0      | 0      | 3      | 1      | 3      |
|                          | 5TMS       | 3      | 4      | 6      | 4      | 7      | 5      |
|                          | 8TMS       | 0      | 0      | 1      | 1      | 2      | 2      |
| Fatty acids              | saturated  | 8      | 11     | 15     | 17     | 17     | 17     |
|                          | monoenoic  | 2      | 6      | 9      | 11     | 11     | 11     |
|                          | dienoic    | 1      | 0      | 2      | 2      | 1      | 3      |
|                          | multienoic | 0      | 1      | 4      | 6      | 9      | 8      |
| Fatty acid methyl esters | saturated  | 0      | 1      | 5      | 8      | 8      | 8      |
|                          | monoenoic  | 0      | 1      | 3      | 4      | 4      | 4      |
|                          | dienoic    | 0      | 0      | 0      | 2      | 2      | 3      |
|                          | trienoic   | 0      | 0      | 0      | 1      | 2      | 2      |
|                          | multienoic | 0      | 0      | 0      | 0      | 1      | 2      |
| Amino acids              |            | 0      | 1      | 4      | 3      | 6      | 6      |
| Total Number Correct     |            | 14     | 25     | 49     | 62     | 71     | 74     |
| Total Number Incorrect   |            | 1      | 0      | 0      | 2      | 1      | 0      |
| Total Number Classified  |            | 15     | 25     | 49     | 64     | 72     | 74     |
| Classes                  | Subgroups  | mix 7  | mix 8  | mix 9  | mix 10 | mix 11 | mix 12 |
| Carbohydrates            | 4TMS       | 4      | 4      | 6      | 3      | 4      | 4      |
|                          | 5TMS       | 7      | 10     | 8      | 7      | 5      | 8      |
|                          | 8TMS       | 5      | 5      | 5      | 4      | 3      | 5      |
| Fatty acids              | saturated  | 17     | 17     | 18     | 20     | 20     | 11     |
|                          | monoenoic  | 11     | 11     | 12     | 10     | 10     | 5      |
|                          | dienoic    | 3      | 3      | 3      | 3      | 4      | 0      |
|                          | multienoic | 9      | 9      | 9      | 9      | 11     | 0      |
| Fatty acid methyl esters | saturated  | 9      | 10     | 10     | 11     | 12     | 8      |
|                          | monoenoic  | 7      | 5      | 7      | 6      | 5      | 7      |
|                          | dienoic    | 2      | 3      | 3      | 3      | 3      | 2      |
|                          | trienoic   | 3      | 2      | 2      | 2      | 2      | 1      |
|                          | multienoic | 2      | 2      | 3      | 2      | 1      | 2      |
| Amino acids              |            | 7      | 10     | 11     | 12     | 13     | 1      |
| Total Number Correct     |            | 86     | 91     | 97     | 92     | 93     | 54     |
| Total Number Incorrect   |            | 0      | 0      | 0      | 1      | 2      | 0      |
| Total Number Classified  |            | 86     | 91     | 97     | 93     | 95     | 54     |
| Classes                  | Subgroups  | mix 13 | mix 14 | mix 15 | mix 16 | mix 17 | mix 18 |
| Carbohydrates            | 4TMS       | 2      | 5      | 2      | 3      | 4      | 3      |
|                          | 5TMS       | 3      | 8      | 2      | 4      | 9      | 9      |
|                          | 8TMS       | 0      | 5      | 0      | 0      | 5      | 5      |
| Fatty acids              | saturated  | 16     | 17     | 15     | 16     | 10     | 12     |
|                          | monoenoic  | 9      | 10     | 9      | 10     | 4      | 3      |
|                          | dienoic    | 3      | 3      | 0      | 3      | 0      | 0      |
|                          | multienoic | 9      | 9      | 5      | 10     | 0      | 1      |
| Fatty acid methyl esters | saturated  | 3      | 4      | 10     | 10     | 0      | 0      |
|                          | monoenoic  | 2      | 3      | 7      | 6      | 2      | 0      |
|                          | dienoic    | 0      | 2      | 3      | 3      | 0      | 0      |
|                          | trienoic   | 0      | 0      | 3      | 2      | 0      | 0      |
|                          | multienoic | 0      | 0      | 3      | 2      | 0      | 0      |
| Amino acids              |            | 8      | 3      | 9      | 3      | 3      | 8      |
| Total Number Correct     |            | 55     | 69     | 68     | 72     | 37     | 41     |
| Total Number Incorrect   |            | 0      | 0      | 0      | 0      | 0      | 1      |
| Total Number Classified  |            | 55     | 69     | 68     | 72     | 37     | 42     |

## **Details of Sample Preparation**

### **A. SPME (Solid-phase microextraction)**

#### **1) Sweat**

Sweat was collected on a cotton t-shirt, and the fabric was cut into a 2 cm × 2 cm square from the armpit region. The cut sample was immediately placed in a 10-mL SPME vial and sealed. A pre-cleaned 3-phase SPME fibre divinylbenzene/carboxen/polydimethylsiloxane (DVB/CAR/PDMS) (SUPELCO, Bellefonte, PA, USA) was used to extract the volatiles for 21 h at 30 °C while the sample vial was immersed in a temperature-controlled oil bath. The fibre was thermally desorbed for 3.5 min at the inlet temperature set to 250 °C.

#### **2) Feces**

Immediately after the passage (within 10 min), feces were mixed with a stirring rod for 1 min to homogenize the sample manually. 500 mg aliquot of a fecal sample was transferred into a 10 mL SPME vial and capped immediately. Prior to GC injection, the sample was incubated at 60 °C for 15 min, then extracted with a 3-phase SPME fibre DVB/CAR/PDMS (SUPELCO, Bellefonte, PA, USA) for 2 hours at 60 °C. The fibre was thermally desorbed for 3 min at the inlet temperature set to 250 °C.

### **B. Derivatization**

#### **1) Plasma**

P9523-5ML plasma that was prepared from pooled human blood with 4% trisodium citrate as an anticoagulant, was purchased from Sigma-Aldrich (St. Louis, MO, USA). When the product was received, the lyophilized plasma was reconstituted with 5 mL of deionized water and was aliquoted into 2-mL centrifuge tubes. The aliquoted plasma was stored in a –80 °C freezer until the day of analysis. On the day of analysis, a 2-mL centrifuge tube containing plasma was thawed on ice, vortexed for 1 min, and a 40 µL aliquot of plasma was pipetted into a new 2-mL centrifuge tube. 300 µL of methanol was added, and the resulting mixture was vortexed for 3 min, then centrifuged for 15 min at 15,800 g and 4 °C. 100 µL of supernatant was withdrawn, transferred into a 2-mL GC vial and dried under a gentle stream of nitrogen. To the dried residue, 100 µL of toluene dried over anhydrous sodium sulfate was added to enhance the drying of trace amounts of water and dried again at 80 °C under N<sub>2</sub> for 30 min. Next, 50 µL of methoxyamine hydrochloride was added and incubated at 80 °C for 30 min. Subsequently, 50 µL of MSTFA was added and incubated at 80 °C for 30 min. The resulting derivatized sample was cooled for 5

min at room temperature and was transferred into a GC vial with a fused 300  $\mu$ L insert for GC $\times$ GC-TOFMS analysis.

## **2) Urine**

On the night before the sample preparation, a frozen urine sample was thawed on ice overnight. On the day of analysis, the thawed urine sample was vortexed for 1 min, then 40  $\mu$ L aliquot of urine was transferred into a 2-mL centrifuge tube, and 10  $\mu$ L of urease suspension was added. The sample was vortexed for 3 min then incubated at 37 °C for 1 h. After incubation, 960  $\mu$ L of methanol was added to the sample, vortexed for 5 min, then centrifuged for 10 min at 10,000 g and 4 °C. 500  $\mu$ L of the supernatant was transferred into a 2-mL GC vial and dried under nitrogen at 50 °C. To the dried residue, 100  $\mu$ L of toluene dried over anhydrous sodium sulfate was added to enhance the drying. To the dried extract, 20 mg/mL methoxyamine hydrochloride in pyridine was added and incubated at 60 °C for 2 h. Following the methoximation, 100  $\mu$ L of MSTFA was added and incubated at 60 °C for 1 h. After cooling the resulting derivatized urine at room temperature for 5 min, the sample was transferred to a GC-vial with 300-  $\mu$ L inserts for analysis by GC $\times$ GC-TOFMS.
